# Supplementary material for: Novel Hybrid Quadrupole-Multireflecting Time-of-Flight Mass Spectrometry System
Source: PubMed Central journal article supplement (PMC9896552; doi:10.1021/jasms.2c00281), 2023-01-05
Supplement: js2c00281_si_001.pdf [file js2c00281_si_001.pdf]

## Supplementary Information

### A novel quadrupole multireflecting time-of-flight mass spectrometry system

Dale A. Cooper-Shepherd<sup>1</sup>, Jason Wildgoose<sup>1</sup>, Boris Kozlov<sup>1</sup>, William J. Johnson<sup>1</sup>, Richard Tyldesley-Worster<sup>1</sup>, Martin E. Palmer<sup>1</sup>, John B. Hoyes<sup>1†</sup>, Michael McCullagh<sup>1</sup>, Emrys Jones<sup>1</sup>, Robert Tonge<sup>1</sup>, Emma Marsden-Edwards<sup>1</sup>, Peter Nixon<sup>1</sup>, Anatoly Verentchikov<sup>2</sup>, James I. Langridge<sup>1\*</sup>

1. Waters Corporation, Stamford Avenue, Altrincham Road, Wilmslow, Cheshire, UK, SK9 4AX

2. MSC-CG Ltd, Bar, Montenegro

† Present Address: TrueMass, Lower Harthill Barn, Goddard Lane, Rowarth, High Peak, Derbyshire, UK, SK22 1ED

#### Table of Contents

|                                                                                                                             |     |
|-----------------------------------------------------------------------------------------------------------------------------|-----|
| Figure S1. The MRT analyzer operated with a shortened flight path. ....                                                     | S2  |
| Figure S2. MRT mass spectrum of L-arginine clusters across the mass range 175- 1569 <i>m/z</i> . ....                       | S3  |
| Figure S3. Carbamazepine-o-glucuronide product ion spectrum. ....                                                           | S3  |
| Figure S4. Experimentally observed intra-spectrum dynamic range for the Q-MRT instrument. ....                              | S4  |
| Figure S5. A comparison of the ‘diamond’ and full flight path modes of operation. ....                                      | S5  |
| Figure S6. The capabilities of the MRT analyzer for MSI. ....                                                               | S6  |
| Figure S7. Positive ion DESI mode spectrum from mouse brain tissue ....                                                     | S7  |
| Figure S8. Negative ion DESI mass spectrum from mouse brain tissue.....                                                     | S9  |
| Table S2. Mass accuracy in negative ion DESI mode ....                                                                      | S10 |
| Figure S9. Mass accuracy for selected evenly-distributed lipids across a DESI-MSI experiment performed on murine brain..... | S12 |
| Supplementary Methods .....                                                                                                 | S13 |

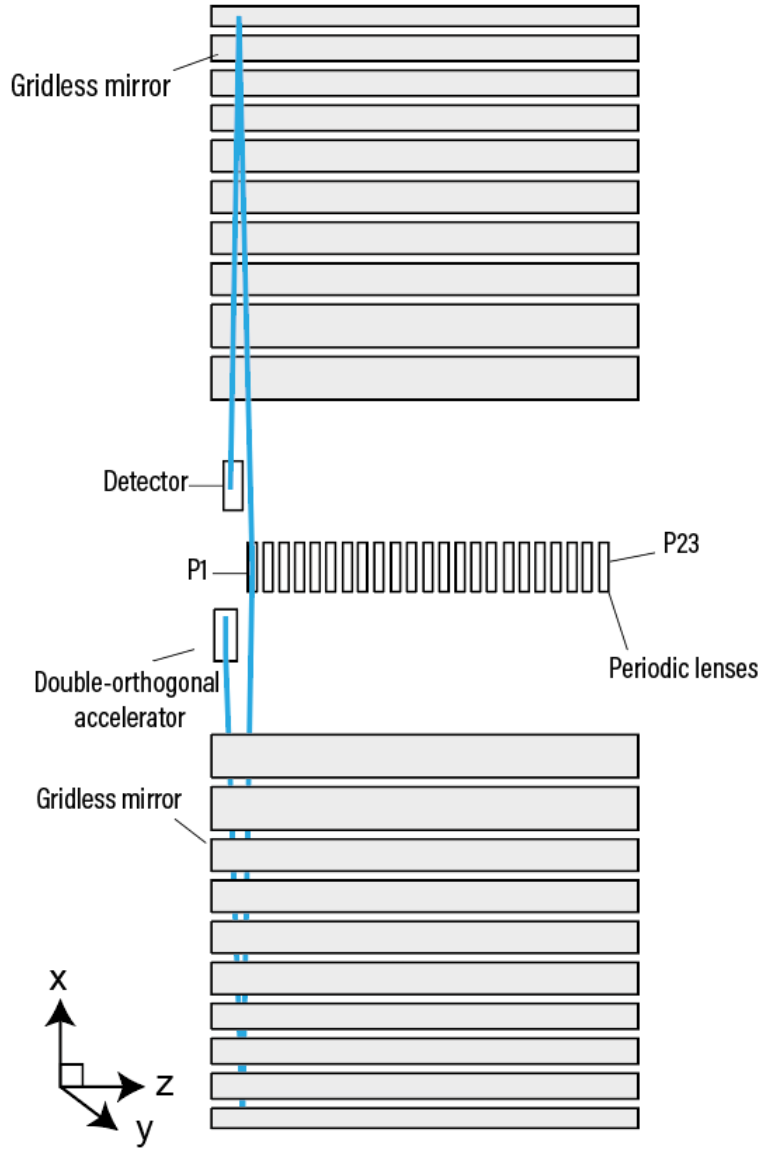

Figure S1. The MRT analyzer operated with a shortened flight path. The double orthogonal accelerator deflects ions into the first mirror and into lens P1. Unlike in full flight path mode P1 deflects the ion packet into the second mirror and to the detector. Altogether the flight path describes a 'diamond' shaped flight path. The operating resolving power of this mode is of the order of 10,000 FWHM.

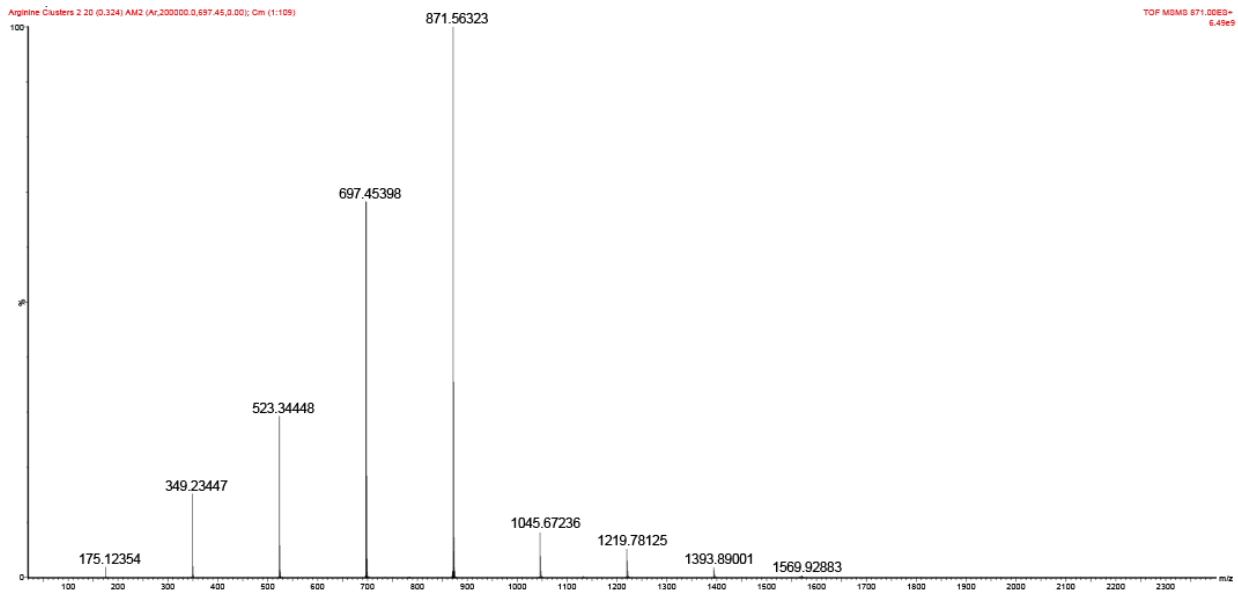

Figure S2. MRT mass spectrum of L-arginine clusters across the mass range 175- 1569  $m/z$ .

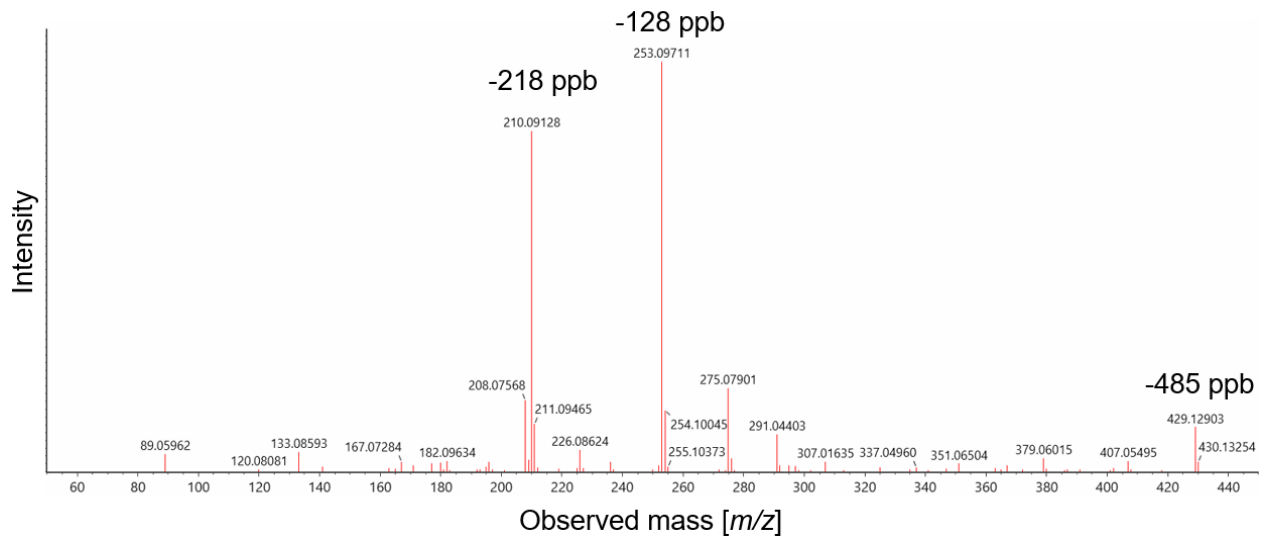

Figure S3. Carbamazepine-o-glucuronide product ion spectrum. The observed mass resolution on the product ions is the same as for precursors of the same mass. Observed mass errors are shown above the signals.

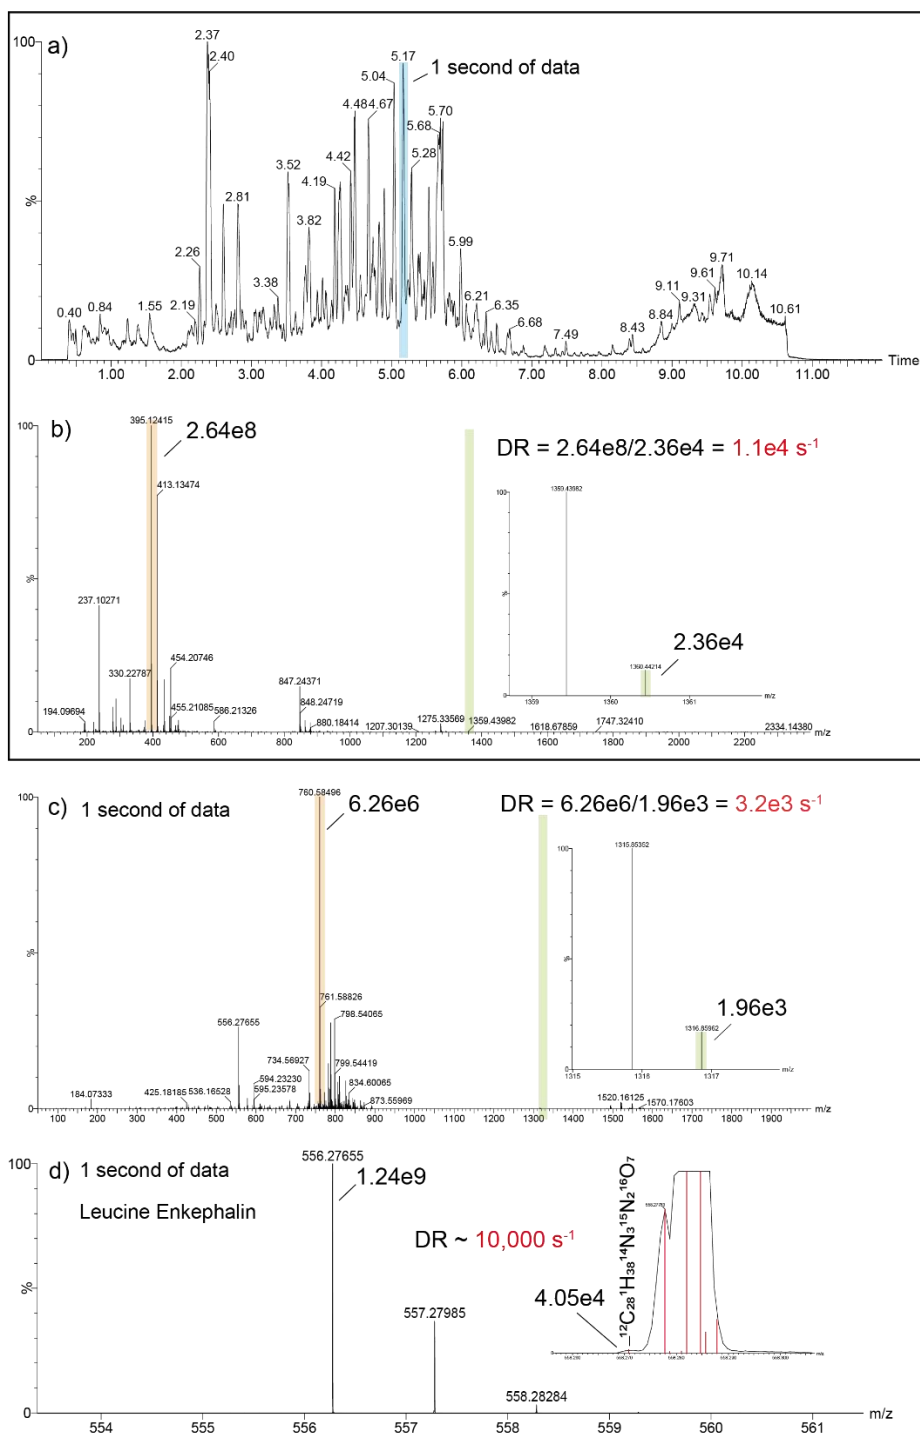

Figure S4. Experimentally observed intra-spectrum dynamic range (DR) for the Q-MRT instrument. a) total ion chromatogram for a single run from a metabolite identification study. A spectrum from one second of data was taken from one of the intense peaks in order to assess the dynamic range. b) By taking the observed intensity of the base peak and a low lying signal the dynamic range was calculated to be  $1.1e4 \text{ s}^{-1}$ . c) One second of data taken from a DESI imaging experiment. The dynamic range of this spectrum was measured to be  $3.2e3 \text{ s}^{-1}$ . d) A quantitative assessment of dynamic range using fine isotope signals from Leucine enkephalin. The signal from the fine isotope species  $^{12}\text{C}_{28}\text{H}_{38}\text{N}_3^{15}\text{N}_2^{16}\text{O}_7$  is theoretically 0.01 % of the monoisotopic species. This is measured at a similar level using the Q-MRT instrument and verifies an intra-spectrum dynamic range of at least  $10,000 \text{ s}^{-1}$ , i.e. four orders, in this case.

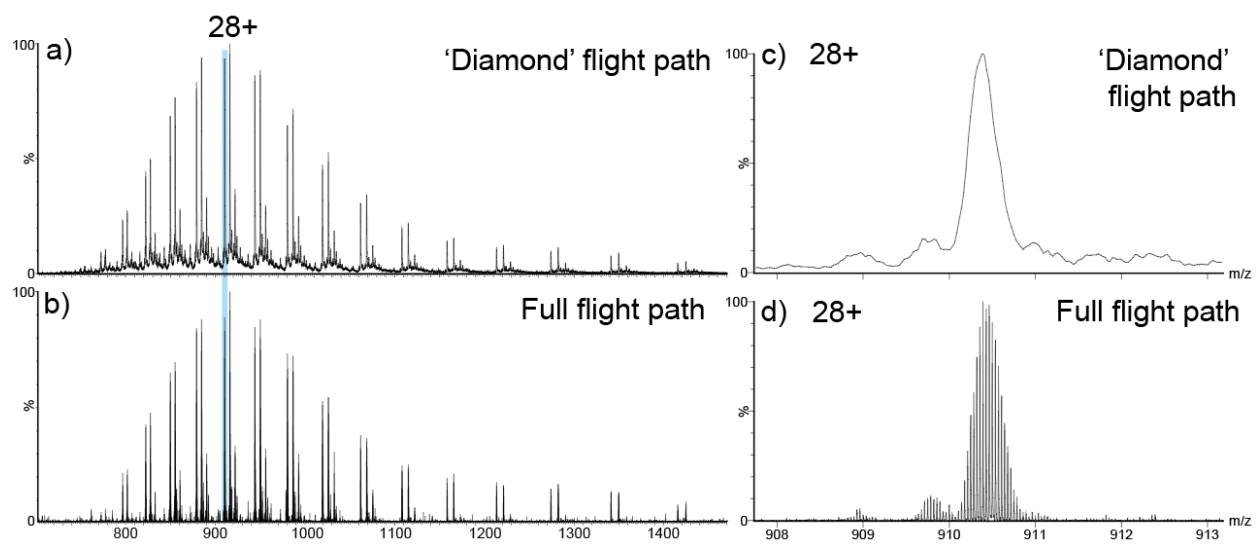

Figure S5. A comparison of the 'diamond' and full flight path modes of operation. a) and b) show the full charge state distributions of the Fc/2 subunit of IdeS-digested NISTmAb in diamond and full flight path modes, respectively. c) and d) show the 28+ charge state of a single isoform (GOF) showing resolving powers of the order 10,000 and 200,000 FWHM, respectively.

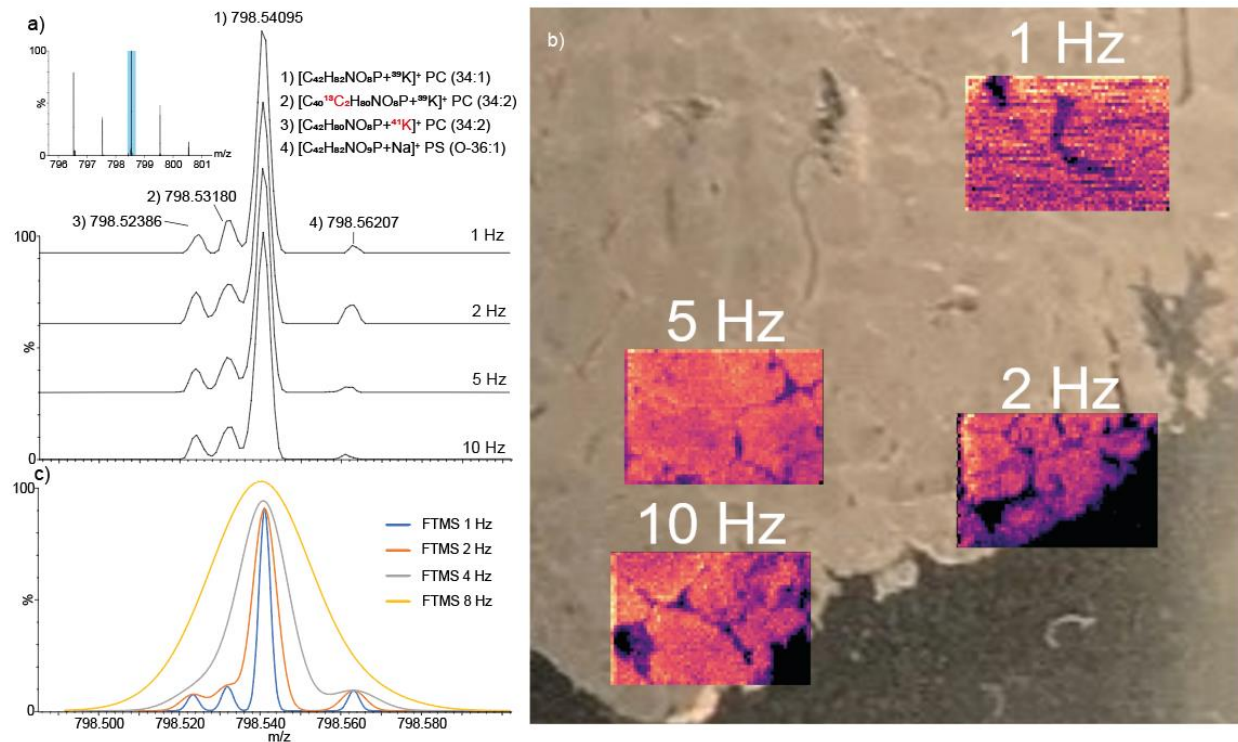

Figure S6. The capabilities of the MRT analyzer for MSI. a) - Zoomed region of the mass spectrum acquired at 1, 2, 5 and 10 Hz by DESI from a section of porcine liver. Four signals are observed some of which correspond to fine isotope structure of nearby lipids. The resolving power does not deteriorate with acquisition speeds. The inset at the top shows a wider, 5 Th, region of the same spectrum. b) The ion images for mass 798.54095 m/z at 1, 2, 5, and 10 Hz. Bottom - a simulated mass spectrum of the same group of signals obtained from a high-field D20 orbitrap mass analyzer at 1, 2, 4, and 8 Hz. The decrease in resolving power as speed is increased is apparent.

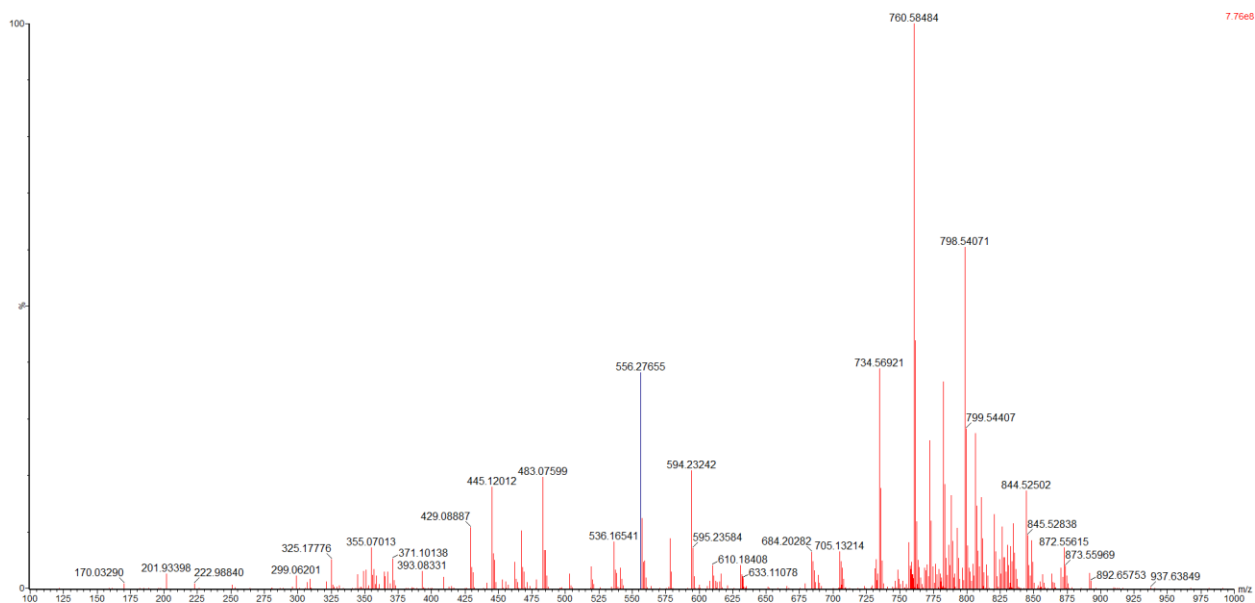

Figure S7. Positive ion DESI mode spectrum from mouse brain tissue

Table S1. Mass accuracy in positive ion DESI mode

| Putative ID       | Formula                                                         | Adduct          | Expected mass | Observed mass | mDa error | ppb error |
|-------------------|-----------------------------------------------------------------|-----------------|---------------|---------------|-----------|-----------|
| Cholesterol -H2O  | C <sub>27</sub> H <sub>44</sub>                                 | H <sup>+</sup>  | 369.351578    | 369.35175     | 0.172     | 466       |
| LysoPC (16:0)     | C <sub>24</sub> H <sub>50</sub> NO <sub>7</sub> P               | H <sup>+</sup>  | 496.339766    | 496.33994     | 0.174     | 351       |
| LysoPE (22:6)     | C <sub>27</sub> H <sub>44</sub> NO <sub>7</sub> P               | H <sup>+</sup>  | 526.292816    | 526.29291     | 0.094     | 179       |
| C18 Sphingomyelin | C <sub>41</sub> H <sub>83</sub> N <sub>2</sub> O <sub>6</sub> P | H <sup>+</sup>  | 731.606151    | 731.60590     | -0.251    | -343      |
| PC (32:1)         | C <sub>40</sub> H <sub>78</sub> NO <sub>8</sub> P               | H <sup>+</sup>  | 732.553781    | 732.55347     | -0.311    | -425      |
| PC (32:0)         | C <sub>40</sub> H <sub>80</sub> NO <sub>8</sub> P               | H <sup>+</sup>  | 734.569431    | 734.56921     | -0.221    | -302      |
| PC (32:0)         | C <sub>40</sub> H <sub>80</sub> NO <sub>8</sub> P               | Na <sup>+</sup> | 756.551376    | 756.55115     | -0.226    | -299      |
| PC (34:2)         | C <sub>42</sub> H <sub>80</sub> NO <sub>8</sub> P               | H <sup>+</sup>  | 758.569431    | 758.56915     | -0.281    | -371      |
| PC (34:1)         | C <sub>42</sub> H <sub>82</sub> NO <sub>8</sub> P               | H <sup>+</sup>  | 760.585082    | 760.58484     | -0.242    | -318      |
| PC (32:0)         | C <sub>40</sub> H <sub>80</sub> NO <sub>8</sub> P               | K <sup>+</sup>  | 772.525313    | 772.52502     | -0.293    | -379      |
| PC (34:2)         | C <sub>42</sub> H <sub>80</sub> NO <sub>8</sub> P               | Na <sup>+</sup> | 780.551376    | 780.55176     | 0.384     | 492       |
| PC (36:1)         | C <sub>44</sub> H <sub>86</sub> NO <sub>8</sub> P               | H <sup>+</sup>  | 788.616382    | 788.61609     | -0.292    | -370      |
| PC (34:2)         | C <sub>42</sub> H <sub>80</sub> NO <sub>8</sub> P               | K <sup>+</sup>  | 796.525313    | 796.52496     | -0.353    | -443      |
| PC (34:1)         | C <sub>42</sub> H <sub>82</sub> NO <sub>8</sub> P               | K <sup>+</sup>  | 798.540963    | 798.54071     | -0.253    | -317      |
| PC (36:4)         | C <sub>44</sub> H <sub>80</sub> NO <sub>8</sub> P               | Na <sup>+</sup> | 804.551376    | 804.55121     | -0.166    | -206      |

|            |                                                   |                 |            |           |        |            |
|------------|---------------------------------------------------|-----------------|------------|-----------|--------|------------|
| PC (38:6)  | C <sub>46</sub> H <sub>80</sub> NO <sub>8</sub> P | H <sup>+</sup>  | 806.569431 | 806.56909 | -0.341 | -423       |
| PC (36:4)  | C <sub>44</sub> H <sub>80</sub> NO <sub>8</sub> P | K <sup>+</sup>  | 820.525313 | 820.52502 | -0.293 | -357       |
| PC (36:3)  | C <sub>44</sub> H <sub>82</sub> NO <sub>8</sub> P | K <sup>+</sup>  | 822.540963 | 822.54059 | -0.373 | -454       |
| PC (36:2)  | C <sub>44</sub> H <sub>84</sub> NO <sub>8</sub> P | K <sup>+</sup>  | 824.556613 | 824.55621 | -0.403 | -489       |
| PC (36:1)  | C <sub>44</sub> H <sub>86</sub> NO <sub>8</sub> P | K <sup>+</sup>  | 826.572263 | 826.57190 | -0.363 | -440       |
| PC (38:6)  | C <sub>46</sub> H <sub>80</sub> NO <sub>8</sub> P | Na <sup>+</sup> | 828.551376 | 828.55103 | -0.346 | -417       |
| PC (37:6)  | C <sub>45</sub> H <sub>78</sub> NO <sub>8</sub> P | K <sup>+</sup>  | 830.509663 | 830.50940 | -0.263 | -317       |
| PC (38:5)  | C <sub>46</sub> H <sub>82</sub> NO <sub>8</sub> P | Na <sup>+</sup> | 830.567026 | 830.56726 | 0.234  | 282        |
| PC (40:6)  | C <sub>48</sub> H <sub>84</sub> NO <sub>8</sub> P | H <sup>+</sup>  | 834.600732 | 834.60034 | -0.392 | -469       |
| PC (38:6)  | C <sub>46</sub> H <sub>80</sub> NO <sub>8</sub> P | K <sup>+</sup>  | 844.525313 | 844.52502 | -0.293 | -347       |
| PC (38:4)  | C <sub>46</sub> H <sub>84</sub> NO <sub>8</sub> P | K <sup>+</sup>  | 848.556613 | 848.55627 | -0.343 | -405       |
| PC (40:6)  | C <sub>48</sub> H <sub>84</sub> NO <sub>8</sub> P | Na <sup>+</sup> | 856.582676 | 856.58240 | -0.276 | -322       |
| PC (44:12) | C <sub>52</sub> H <sub>80</sub> NO <sub>8</sub> P | H <sup>+</sup>  | 878.569431 | 878.56909 | -0.341 | -388       |
|            |                                                   |                 |            | Mean      | -0.209 | -244       |
|            |                                                   |                 |            | SD        | 0.214  | 299        |
|            |                                                   |                 |            | RMS       | 0.299  | <b>386</b> |



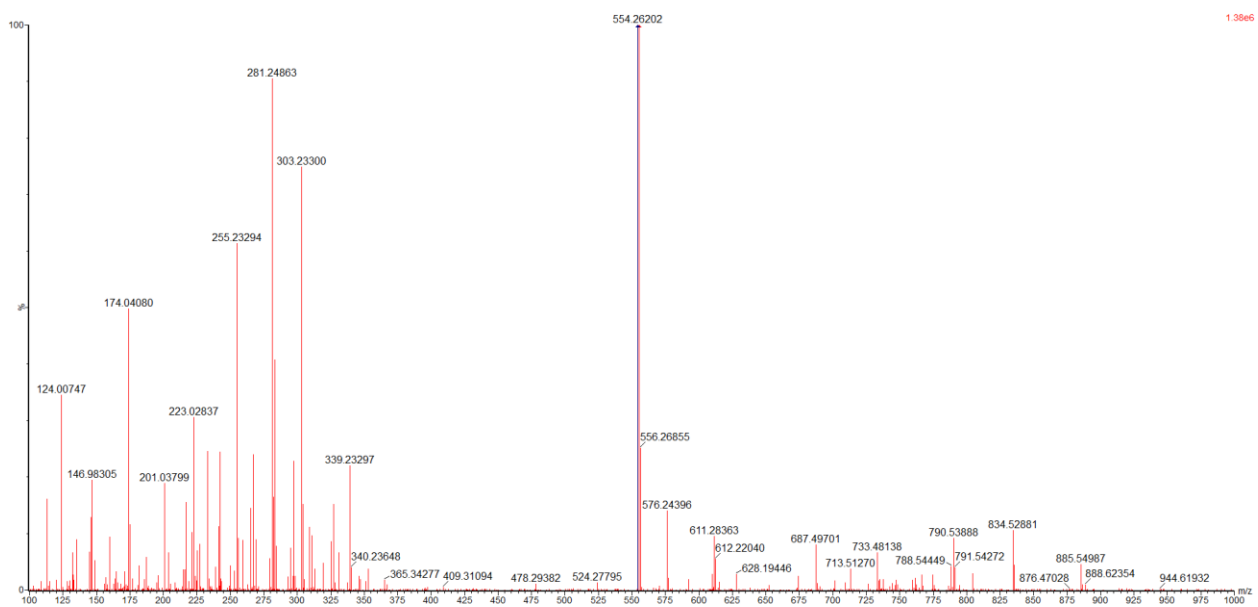

Figure S8. Negative ion DESI mass spectrum from mouse brain tissue

Table S2. Mass accuracy in negative ion DESI mode

| Putative ID               | Formula                                                       | Adduct         | Expected mass | Observed mass | mDa error | ppb error |
|---------------------------|---------------------------------------------------------------|----------------|---------------|---------------|-----------|-----------|
| Fumarate                  | C <sub>4</sub> H <sub>4</sub> O <sub>4</sub>                  | H <sup>-</sup> | 115.003682    | 115.00374     | 0.058     | 504       |
| Succinate                 | C <sub>4</sub> H <sub>6</sub> O <sub>4</sub>                  | H <sup>-</sup> | 117.019332    | 117.01936     | 0.028     | 239       |
| Taurine                   | C <sub>2</sub> H <sub>7</sub> NO <sub>3</sub> S               | H <sup>-</sup> | 124.007387    | 124.00747     | 0.083     | 669       |
| Pyroglutamate             | C <sub>5</sub> H <sub>7</sub> NO <sub>3</sub>                 | H <sup>-</sup> | 128.035317    | 128.03540     | 0.083     | 648       |
| Aspartate                 | C <sub>4</sub> H <sub>7</sub> NO <sub>4</sub>                 | H <sup>-</sup> | 132.030231    | 132.03026     | 0.029     | 220       |
| Malate                    | C <sub>4</sub> H <sub>6</sub> O <sub>5</sub>                  | H <sup>-</sup> | 133.014247    | 133.01433     | 0.083     | 624       |
| Hypoxanthine              | C <sub>5</sub> H <sub>4</sub> N <sub>4</sub> O                | H <sup>-</sup> | 135.031234    | 135.03130     | 0.066     | 489       |
| Glutamine                 | C <sub>5</sub> H <sub>10</sub> N <sub>2</sub> O <sub>3</sub>  | H <sup>-</sup> | 145.061866    | 145.06187     | 0.004     | 28        |
| Glutamate                 | C <sub>5</sub> H <sub>9</sub> NO <sub>4</sub>                 | H <sup>-</sup> | 146.045881    | 146.04590     | 0.019     | 130       |
| N-acetyl-Aspartate        | C <sub>6</sub> H <sub>9</sub> NO <sub>5</sub>                 | H <sup>-</sup> | 174.040796    | 174.04080     | 0.004     | 23        |
| Propanetricarboxylic acid | C <sub>6</sub> H <sub>8</sub> O <sub>6</sub>                  | H <sup>-</sup> | 175.024812    | 175.02475     | -0.062    | -354      |
| Palmitoleic acid          | C <sub>16</sub> H <sub>30</sub> O <sub>2</sub>                | H <sup>-</sup> | 253.217304    | 253.21732     | 0.016     | 63        |
| Palmitic acid             | C <sub>16</sub> H <sub>32</sub> O <sub>2</sub>                | H <sup>-</sup> | 255.232954    | 255.23294     | -0.014    | -55       |
| Inosine                   | C <sub>10</sub> H <sub>12</sub> N <sub>4</sub> O <sub>5</sub> | H <sup>-</sup> | 267.073493    | 267.07349     | -0.003    | -11       |
| Linoleic acid             | C <sub>18</sub> H <sub>32</sub> O <sub>2</sub>                | H <sup>-</sup> | 279.232954    | 279.23303     | 0.076     | 272       |
| Octadecenoic acid         | C <sub>18</sub> H <sub>34</sub> O <sub>2</sub>                | H <sup>-</sup> | 281.248604    | 281.24863     | 0.026     | 92        |
| Octadecanoic acid         | C <sub>18</sub> H <sub>36</sub> O <sub>2</sub>                | H <sup>-</sup> | 283.264254    | 283.26428     | 0.026     | 92        |
| Arachidonic acid          | C <sub>20</sub> H <sub>32</sub> O <sub>2</sub>                | H <sup>-</sup> | 303.232954    | 303.23300     | 0.046     | 152       |
| Eicosenoic acid           | C <sub>20</sub> H <sub>38</sub> O <sub>2</sub>                | H <sup>-</sup> | 309.279904    | 309.27991     | 0.006     | 19        |
| HETE                      | C <sub>20</sub> H <sub>32</sub> O <sub>3</sub>                | H <sup>-</sup> | 319.227868    | 319.22794     | 0.072     | 226       |
| Adrenic acid              | C <sub>22</sub> H <sub>36</sub> O <sub>2</sub>                | H <sup>-</sup> | 331.264254    | 331.26431     | 0.056     | 169       |
| LysoPE (18:1)             | C <sub>23</sub> H <sub>46</sub> NO <sub>7</sub> P             | H <sup>-</sup> | 478.293913    | 478.29382     | -0.093    | -194      |
| LysoPE (22:6)             | C <sub>27</sub> H <sub>44</sub> NO <sub>7</sub> P             | H <sup>-</sup> | 524.278263    | 524.27795     | -0.313    | -597      |
| PA (35:1)                 | C <sub>38</sub> H <sub>73</sub> O <sub>8</sub> P              | H <sup>-</sup> | 687.497029    | 687.49701     | -0.019    | -28       |
| PE (P-36:2)               | C <sub>41</sub> H <sub>78</sub> NO <sub>7</sub> P             | H <sup>-</sup> | 726.544314    | 726.54437     | 0.056     | 77        |
| PE (P-38:6)               | C <sub>43</sub> H <sub>74</sub> NO <sub>7</sub> P             | H <sup>-</sup> | 746.513014    | 746.51257     | -0.444    | -595      |
| PC (35:4)                 | C <sub>43</sub> H <sub>78</sub> NO <sub>8</sub> P             | H <sup>-</sup> | 766.539229    | 766.53900     | -0.229    | -299      |

|            |                                                    |                |            |           |        |            |
|------------|----------------------------------------------------|----------------|------------|-----------|--------|------------|
| PE (P40:6) | C <sub>45</sub> H <sub>78</sub> NO <sub>7</sub> P  | H <sup>-</sup> | 774.544314 | 774.54376 | -0.554 | -715       |
| PC (37:6)  | C <sub>45</sub> H <sub>78</sub> NO <sub>8</sub> P  | H <sup>-</sup> | 790.539229 | 790.53888 | -0.349 | -441       |
| PS (37:0)  | C <sub>43</sub> H <sub>84</sub> NO <sub>10</sub> P | H <sup>-</sup> | 804.576008 | 804.57574 | -0.268 | -333       |
| PS (40:6)  | C <sub>46</sub> H <sub>78</sub> NO <sub>10</sub> P | H <sup>-</sup> | 834.529058 | 834.52881 | -0.248 | -297       |
| PI (38:4)  | C <sub>47</sub> H <sub>83</sub> O <sub>13</sub> P  | H <sup>-</sup> | 885.549853 | 885.54987 | 0.017  | 19         |
|            |                                                    |                |            | Mean      | -0.054 | 26         |
|            |                                                    |                |            | SD        | 0.168  | 356        |
|            |                                                    |                |            | RMS       | 0.177  | <b>357</b> |

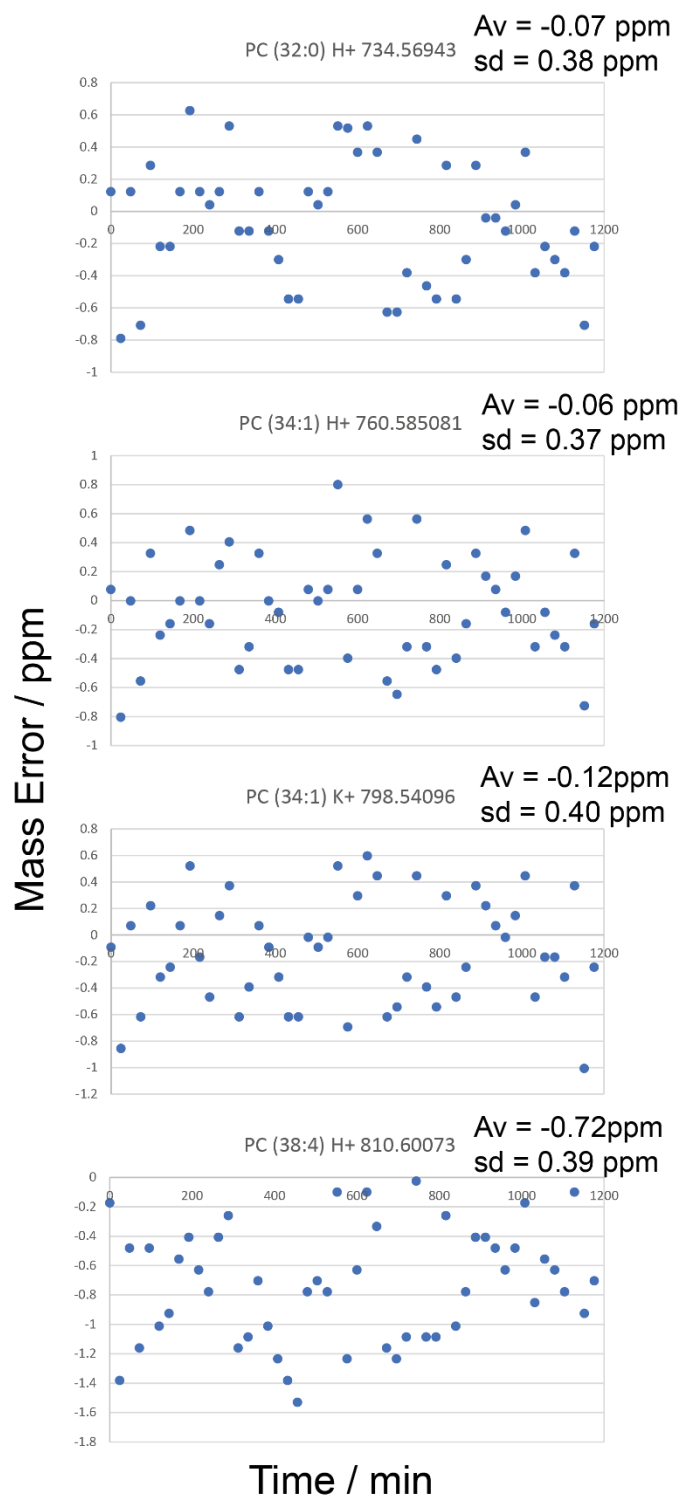

Figure S9. Mass accuracy for selected evenly-distributed lipids across a DESI-MSI experiment performed on murine brain. Values for PC (32:0) [M+H]<sup>+</sup>, PC (34:1) [M+H]<sup>+</sup>, PC (34:1) [M+K]<sup>+</sup> and PC (38:4) [M+H]<sup>+</sup> are shown for 50 spectra across the 21 hour run after internal lockmass correction (leucine enkephalin). Average and standard deviation values are displayed on each plot. Each lipid has values scattered around zero except for PC (38:4), suggesting an interference.

## Supplementary Methods

### *Comparisons to Orbitrap instruments*

The MRT analyzer is compared in Figure S6 to the D20 high-field compact orbitrap analyzer. At scan rates of approximately 1, 2, 4, and 8 Hz we have assumed transient lengths of 1024, 512, 256, and 128 ms. The spectra were calculated using the enviPat web application<sup>1</sup>.

- (1) Loos, M.; Gerber, C.; Corona, F.; Hollender, J.; Singer, H. Accelerated Isotope Fine Structure Calculation Using Pruned Transition Trees. *Anal. Chem.* **2015**, *87* (11), 5738–5744. <https://doi.org/10.1021/acs.analchem.5b00941>.
